# Supplementary material for: Urbilaterian origin of paralogous GnRH and corazonin neuropeptide signalling pathways
Source: PubMed Central journal article supplement (PMC4923880; doi:10.1038/srep28788), 2016-06-28
Supplement: srep28788-s1.pdf [file srep28788-s1.pdf]

**Urbilaterian origin of paralogous GnRH and  
corazonin neuropeptide signalling pathways**

Shi Tian, Meet Zandawala, Isabel Beets, Esra Baytemur,  
Susan E. Slade, James H. Scrivens, Maurice R. Elphick

**SUPPLEMENTARY INFORMATION**

```

1      cagtcttcatcagagtcggcaaccataccgcattgggctcggacggatgccaggtatctcagttgaactgcggttagaaa
81     ccaagaagattcctacacagtcagtcagctccgactccaacagttggttcgtgaatacttctgcatgactccccgtt
161    gtcaggtaaaagcaattttggaaatgccaatctcctcatcaagatatgagaggtgagtaacctcaggggaatgcacttcgatg
241    ctaacagagagggactcaaggacgtcatatcgcccgccctcgacggtcagaatcaaccagtcatacaaaaaaccggggct
321    cactgtagtaacgtgtcctcggctcagatcacacacgcagtgaaatctgatgatgtgtgataaagtgaacactcttaga
481    gtaagatcatcagttgcttctgttactgggtgaacttccagaaggaacactcgaactttgaacatcttatgatgtgat
561    cgaacaatcttagagttgatctctagttacttctgttacgcttttgaacttcccgaagtaaacactggcggttgtaacat
641    ctgacgatgtgatggaaccctcttagaataagatcgccagttgctgcttgtaacgttttcaactccctggagggaactatt
721    catttcttgcttgggttcgcaatctgtaaacacccatggcgactacatcagtcactccaactttgataacttaccatttatg
      M A T T S V N P T L I T Y I Y 15
801    agacagtggaagtgaatgatacctactccaacttcaccaaagcgggcccgcagctctgatggcaatggaaccgactatcat
E T V E V N D T Y S N F T K A G P T S D G N G T D Y H 42
881    tcaggtattagcatttatgatgattacttaatacagactgattctctacgtgattatattcgtagctccacaataggaaa
S G I S I Y D D Y L I R L I L Y V I I F V V S T I G N 69
961    cactgcggtattgtgtagtctcatcaaaggacgcaggaggaagtctcgggtgaatcttctcatcactgacttgactgtag
T A V L C S L I K G R R R K S R V N L L I M H L T V 95
1041   cagatcttatgataacggttcttcaatatcccaacatacttcatctggctcattacataccagtggtacggaggggatatac
A D L M I T F F N I P T Y F I W L I T Y Q W Y G G D I 122
1121   atgtgtaggctccgctcatgtacattggccatggtagggacatacgcgctcgcattcattctcatcgtcataagtctagaccg
M C R S V M Y I A M V G T Y A S P F I L I V I S L D R 149
1201   gtttgccctcattgtattcccacttagcgtccggcagggcagatagaggtgtaagattatgctacgggttgctggtggcag
F A S I V F P L S V R Q A D M R C K I M L R V A W A 175
1281   cgtgtatcatcgcgaagcattcccagcttcttccatcaagtcatgctaccggaagagtgaccagacttcaactcagttgt
A C I I A S I P Q L L I H Q V M S P K S D P D F T Q C 202
1361   gttgactatggattcagaaagaactttcctgtattctggaacttataaccattggttcgtcatggctgccacgtactttat
V D Y G F R K N F P V F W N L Y H W F V M A A T Y F I 229
1441   acctttgacgttgattattggctgctatacttccattgtcatcaaaatattggcaatagcaccatccgcagctattccg
P L T L I I G C Y T S I V I K I F G N S T I R S Y S 255
1521   gtaacaatggcaaccgaatgacgcttctcgtcgcctccggtgctgcacacttccctaaaggctcgcgtgagggcgcttaagatg
G N N G N R M T L R R S G V D T L P K A R V A L K M 282
1601   actggtgcaatcgtcacagccttcatagtatgctggactccaacgtgcattgagggcactatcacccacgcaaacctgc
T G A I V T A F I V C W T P T C I E G T I T H A N P A 309
1681   tctgggagaagcaaccggatgggttgaatcatataatgctagcatttggcttctctaattgtttgatcgaccctaag
L G E A T P I W L N H I M L A F G F S N V C I D P I 335
1761   tctatgggatgttcaccggtgacttttagggcggcatttccaggggtgttttcgactgctggggcggggcgaatatcctgagg
V Y G M F T V D F R R H F C G F D C W G G R N I L R 362
1841   ggtcagcagcagtggaaggtccaaccagtcgtctaacaactatccaccgctcacctatgctgcttccactcagatgtggttac
G R R S G R S T T S S N N Y P P V T Y A S S T R C G T 389
1921   cactacagggcgtgctcagggaaactatcatgtgatggaattggatagtcgccatgggacagctgagaaatggtgtataaagca
T T G V S G N Y H V M E L D S R H G T A E K C V * 413
2001   gtgctttatttgtgatgtcaagagcagagatcatgccacaaaagaagatctaattggttacgacctagggagaatgtc
2081   ttatacattactatcatcttaataagaacaatctcgacaaatctccaacaagactctagcataaaaacaaagcatcca
2161   gtcaatgcattcattctgagtcacaactccgtatacacacatgattattctgtggataaatgaagataaagcaagaata
2241   attttcagtatctcctgaagacgagcagaatgtactgttccgaaacgctcgagac

```

**Supplementary Figure S1. *Asterias rubens* GnRH-type receptor (ArGnRHR).** The transcript cDNA sequence (lowercase; numbering on the left) and the deduced amino acid sequence of the protein coding region (uppercase; numbering on the right) are shown. Within the amino acid sequence, the predicted transmembrane regions are highlighted in black and potential N-linked glycosylation sites are in yellow. The asterisk denotes the stop codon. The transcript sequence encoding ArGnRHR (contig 1119703) was first identified by BLAST analysis of *A. rubens* radial nerve transcriptome sequence data. A cDNA corresponding to the protein-coding region the ArGnRHR transcript was then amplified by PCR from *A. rubens* radial nerve cord cDNA using the primers indicated in the boxes. The cDNA was cloned in the vector pBluescript and T3 and T7 primers were used for sequencing. The cDNA sequence was found to be identical to the protein coding region of contig 1119703. This sequence has been submitted to the GenBank database under accession number KU888680.

```

1   atcagttgggaccgattaacaggattctaagcaaagggttttcgacattcttgctgacaaatataaaaacttgtttaagct
81  tttaaaaagtggtcaaagccttttggataaaaatccaagatgagtggttcaatacacatcagatgagagtgattcgcggtta
      M S V Q Y T S D E S E F A L 14
161  tgtgacttactatcttcagctaccgaatgcgatgagaacactactcgccttacctgaattcagccattcagggcgtt
      C D L L S S A T E C D E N T T I A L P E F T P F T A F 41
241  caaggtagggcgtcttggctctcatgatagatattttccaccggttggaaactgcattgccattgccgtcacctgcaagatcc
      K V G V L A L M I V F S T V G N C I A I A V T C K I 67
321  gtggctgcccggaaatccacagtgactacgctgatcctaaacctggcagtcagtgacctcatcgtgacgtactgccacatg
      R G R R K S T V T T L I L N L A V S D L I V T Y C H M 94
401  ctggctccatgatgatggtactccaccgacgcatggctaggtggggaagctctgtgtaaaatcgctaagttcttctctaa
      L V H M I W Y S T D A W L G G E A L C K I A K F F S N 121
481  ctttggcttatttggcttcatccttcatcactgtggatggttgggttggacaggtgctggcagtaactcgcccgttggggc
      F G L F A S S F I T V D V G L D R C L A V L R P L G 147
561  accgtcagcgaccggttccatattaagatgatgattataacctcgtacatgggttgcctttcttctcagttattccacagctt
      H R Q R P F H I K M M I I T S Y M V A F L F S I P Q L 174
641  atcgttttccggttagagcactggccggttcgatcctgaaatcgacttctggcagtggtgacaaaactgtggcatccctaa
      I V F R L E H W P F D P E I D F W Q C V T N V G I P N 201
721  tgtttatatcgcggtgtatactacaatggtagtcttggccagttcgtggcccccattgggcatcatgatggttgcgtatg
      V Y I A V Y T T L V V L A Q F V A P L G I M M V A Y 227
801  ggctcatcttcatgaaagtgcgacaaaagatcgatgaaagaaccagcgagaatctgtcagagatgctgcaagctcgc
      G L I F M K V R Q K I V M K E T S E N L S E M R Q A R 254
881  tccaagctgttccttcgagcccagagacgtacagtgcgcatggcagtcgccatttttatcgtggttggcatcaactgggtt
      S K L F L R A Q R R T V R M A V A I F I V F A I N W L 281
961  acctacgccatcttgggtcttgggtatgtctggttcccaggccaaacttataacatgtacgtggttggaggtggctttca
      P Y A I F G L W Y V W F P G Q T Y N M Y V F E V A E 307
1041  tgtttggtctgtctaactcctgcttcaaccatctatggagcttgtaacgtgcggtattgtcacaagatctgcgcc
      M F G L S N S C F N P L I Y G A C N V R Y C H K I C A 334
1121  tgttttgggatccggttccaagccagcatggacacgagccactcagaccgctccaacaagacgactatgtactccgtgcg
      C F G I R S K P G M D T S H S D R S N K T T M Y S V R 361
1201  ttggcagtcactaaaggaggttaacaacacacacaagaataataaaggaatagctggactaaaggcacagcagctg
      W Q S S K G G N N T H K N N N K D N S W T K G T A A 387
1281  taccactgagaggcaacagatgatcacaacaacactgaagtattaatcactaaatgacgtccagttattggtgatgg
      V P P E R Q Q M I T T T T * 400
1361  ttgttcatgttaagttgttacaacagatcatttaacccgattgtaaatagagcgggtttccatagtttaaaacaaaggca
1441  ttgaatgacgggtctctaggtgcttcagcaaaaaaaaaaaaaaaaaaaaaa

```

**Supplementary Figure S2. *Asterias rubens* corazonin-type receptor (ArCRZR).** The transcript cDNA sequence (lowercase; numbering on the left) and the deduced amino acid sequence of the protein coding region (uppercase; numbering on the right) are shown. Within the amino acid sequence, the predicted transmembrane regions are highlighted in black and a potential N-linked glycosylation site is in yellow. The asterisk denotes the stop codon. The transcript sequence encoding ArCRZR (contig 1109374) was first identified by BLAST analysis of *A. rubens* radial nerve transcriptome sequence data. A cDNA was amplified by PCR from *A. rubens* radial nerve cord cDNA using the primers indicated in the boxes. The cDNA was cloned in the vector pBluescript and T3 and T7 primers were used for sequencing. The bases highlighted in red are different to those in contig 1109374 but all of these are synonymous substitutions. This sequence has been submitted to the GenBank database under accession number KU888681.

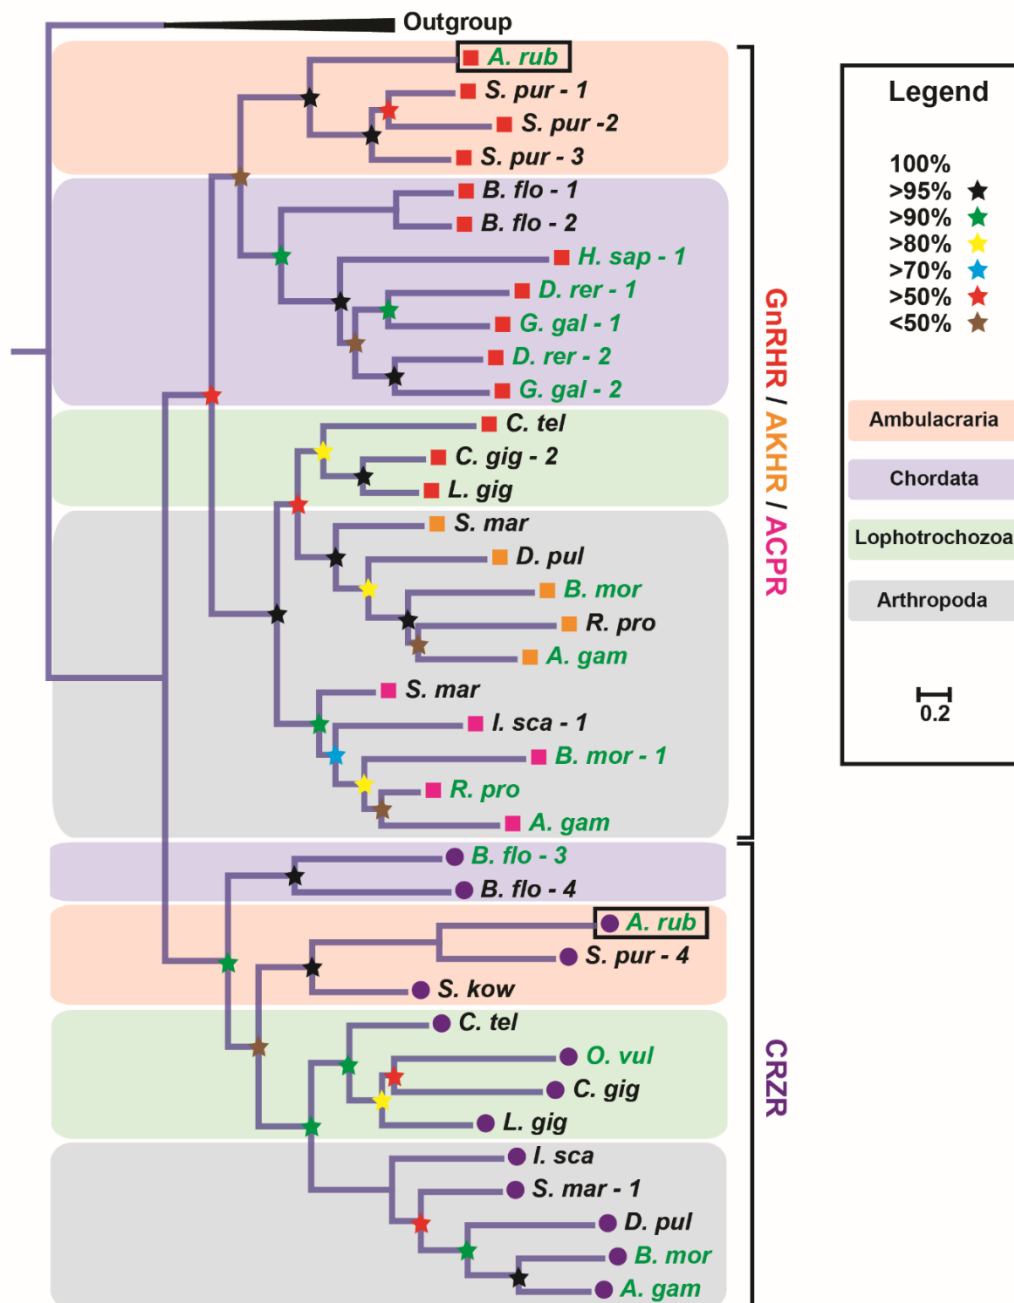

**Supplementary Figure S3. Phylogenetic tree (maximum likelihood) of GnRH/AKH/ACP-type and CRZ-type receptors.** GnRH-type receptors are labelled using red squares, AKH-type receptors using orange squares, ACP-type receptors using pink squares and CRZ-type receptors using purple circles. Neuropeptide S and CCAP receptors were used as an outgroup (condensed). The stars represent bootstrap support and the shaded backgrounds represent different animal groups (see legend). The scale bar indicates amino acid substitutions per site. Species for which receptor-ligand interactions have been experimentally determined are coloured in green and the *A. rubens* receptors characterized in this study are boxed. Note that GnRH-, AKH- and ACP-type receptors on the one hand and CRZ receptors on the other are grouped in two distinct clades. Species names are as follows: *A. rub*, *Asterias rubens*; *S. pur*, *Strongylocentrotus purpuratus*; *B. flo*, *Branchiostoma floridae*; *H. sap*, *Homo sapiens*; *D. rer*, *Danio rerio*; *G. gal*, *Gallus gallus*; *C. tel*, *Capitella teleta*, *C. gig*, *Crassostrea gigas*; *L. gig*, *Lottia gigantea*; *S. mar*, *Strigamia maritima*; *D. pul*, *Daphnia pulex*; *B. mor*, *Bombyx mori*; *R. pro*, *Rhodnius prolixus*; *A. gam*, *Anopheles gambiae*; *I. sca*, *Ixodes*

*scapularis*; *S. kow*, *Saccoglossus kowalevskii*; *O. vul*, *Octopus vulgaris*. The accession numbers and references for the receptor sequences are as follows:

GnRH/AKH/ACP-type receptors –

GnRH receptors:

*A. rub*, KU888680; *S. pur-1*, NP\_001116990.1, (Sodergren, et al. 2006) ; *S. pur-2*, NP\_001116992, (Sodergren, et al. 2006); *S. pur-3*, NP\_001116991, (Sodergren, et al. 2006) ; *B. flo-1*, ACC68665.1, (Tello and Sherwood 2009); *B. flo-2*, ACC68666.1, (Tello and Sherwood 2009) ; *H. sap-1*, NP\_000397.1, (Kakar, et al. 1992) ; *D. rer-1*, NP\_001138452, (Tello, et al. 2008) ; *G. gal-1*, NP\_989984, (Sun, et al. 2001) ; *D. rer-2*, NP\_001138451, (Tello, et al. 2008) ; *G. gal-2*, NP\_001012627.1, (Shimizu and Bedecarrats 2006) ; *C. tel*, ELT93721.1, (Simakov, et al. 2013) ; *C. gig-2*, from WGS, AFTI01018035.1, (Zhang, et al. 2012) ; *L. gig*, ESP05621, (Simakov, et al. 2013) ;

AKH receptors:

*S. mar*, AFFK01020326.1, (Chipman, et al. 2014); *D. pul*, ACD75498, (Colbourne, et al. 2011) ; *B. mor*, NP\_001037049.1, (Hansen, et al. 2010) ; *R. pro*, KF534791, (Zandawala, Hamoudi, et al. 2015) ; *A. gam*, ABD60146.1, (Kaufmann and Brown 2006) ;

ACP receptor:

*S. mar*, AFFK01021969.1 and AFFK01021968.1, (Chipman, et al. 2014); *I. sca-1*, from WGS, ABB010361713.1 and ABB010787461.1, (Ayllon, et al. 2015) ; *B. mor-1*, NP\_001127726.1, (Hansen, et al. 2010) ; *R. pro*, AKO62856.1,(Zandawala, Haddad, et al. 2015) ; *A. gam*, ABX52399.1, (Hansen, et al. 2010);

CRZ-type receptors –

*B. flo-3*, ACC68668.1, (Tello and Sherwood 2009) ; *B. flo-4*, ACN79527.1, (Tello and Sherwood 2009) ; *A. rub*, KU888681; *S. pur-4*, XP\_011680711.1, (Sodergren, et al. 2006) ; *S. kow*, XP\_006819806.1, (Simakov, et al. 2015) ; *C. tel*, ELT93721.1, (Simakov, et al. 2013) ; *O. vul*, Q2V2K5, (Kanda, et al. 2006) ; *C. gig*, from WGS, AFTI01018035.1, (Zhang, et al. 2012) ; *L. gig*, ESP05621, (Simakov, et al. 2013) ; *I. sca*, from WGS, ABB010847221.1 and ABB01088645.1, (Ayllon, et al. 2015) ; *S. mar-1*, from WGS, AFFK01019957.1, (Chipman, et al. 2014) ; *D. pul*, EFX87464.1, (Colbourne, et al. 2011) ; *B. mor*, NP\_001127719.1, (Hansen, et al. 2010) ; *A. gam*, AAQ67361.1, (Belmont, et al. 2006) .

## References

- Ayllon N, Villar M, Galindo RC, Kocan KM, Sima R, Lopez JA, Vazquez J, Alberdi P, Cabezas-Cruz A, Kopacek P, et al. 2015. Systems biology of tissue-specific response to *Anaplasma phagocytophilum* reveals differentiated apoptosis in the tick vector *Ixodes scapularis*. *PLoS Genet* 11:e1005120.
- Belmont M, Cazzamali G, Williamson M, Hauser F, Grimmelikhuijzen CJ. 2006. Identification of four evolutionarily related G protein-coupled receptors from the malaria mosquito *Anopheles gambiae*. *Biochem Biophys Res Commun* 344:160-165.
- Chipman AD, Ferrier DE, Brena C, Qu J, Hughes DS, Schroder R, Torres-Oliva M, Znassi N, Jiang H, Almeida FC, et al. 2014. The first myriapod genome sequence reveals conservative arthropod gene content and genome organisation in the centipede *Strigamia maritima*. *PLoS Biol* 12:e1002005.
- Colbourne JK, Pfrender ME, Gilbert D, Thomas WK, Tucker A, Oakley TH, Tokishita S, Aerts A, Arnold GJ, Basu MK, et al. 2011. The ecoresponsive genome of *Daphnia pulex*. *Science* 331:555-561.

Hansen KK, Stafflinger E, Schneider M, Hauser F, Cazzamali G, Williamson M, Kollmann M, Schachtner J, Grimmelikhuijzen CJ. 2010. Discovery of a novel insect neuropeptide signaling system closely related to the insect adipokinetic hormone and corazonin hormonal systems. *J Biol Chem* 285:10736-10747.

Kakar SS, Musgrove LC, Devor DC, Sellers JC, Neill JD. 1992. Cloning, sequencing, and expression of human gonadotropin releasing hormone (GnRH) receptor. *Biochem Biophys Res Commun* 189:289-295.

Kanda A, Takahashi T, Satake H, Minakata H. 2006. Molecular and functional characterization of a novel gonadotropin-releasing-hormone receptor isolated from the common octopus (*Octopus vulgaris*). *Biochem J* 395:125-135.

Kaufmann C, Brown MR. 2006. Adipokinetic hormones in the African malaria mosquito, *Anopheles gambiae*: identification and expression of genes for two peptides and a putative receptor. *Insect Biochem Mol Biol* 36:466-481.

Shimizu M, Bedecarrats GY. 2006. Identification of a novel pituitary-specific chicken gonadotropin-releasing hormone receptor and its splice variants. *Biol Reprod* 75:800-808.

Simakov O, Kawashima T, Marletaz F, Jenkins J, Koyanagi R, Mitros T, Hisata K, Bredeson J, Shoguchi E, Gyoja F, et al. 2015. Hemichordate genomes and deuterostome origins. *Nature* 527:459-465.

Simakov O, Marletaz F, Cho SJ, Edsinger-Gonzales E, Havlak P, Hellsten U, Kuo DH, Larsson T, Lv J, Arendt D, et al. 2013. Insights into bilaterian evolution from three spiralian genomes. *Nature* 493:526-531.

Sodergren E, Weinstock GM, Davidson EH, Cameron RA, Gibbs RA, Angerer RC, Angerer LM, Arnone MI, Burgess DR, Burke RD, et al. 2006. The genome of the sea urchin *Strongylocentrotus purpuratus*. *Science* 314:941-952.

Sun YM, Flanagan CA, Illing N, Ott TR, Sellar R, Fromme BJ, Hapgood J, Sharp P, Sealson SC, Millar RP. 2001. A chicken gonadotropin-releasing hormone receptor that confers agonist activity to mammalian antagonists. Identification of D-Lys(6) in the ligand and extracellular loop two of the receptor as determinants. *J Biol Chem* 276:7754-7761.

Tello JA, Sherwood NM. 2009. Amphioxus: beginning of vertebrate and end of invertebrate type GnRH receptor lineage. *Endocrinology* 150:2847-2856.

Tello JA, Wu S, Rivier JE, Sherwood NM. 2008. Four functional GnRH receptors in zebrafish: analysis of structure, signaling, synteny and phylogeny. *Integr Comp Biol* 48:570-587.

Zandawala M, Haddad AS, Hamoudi Z, Orchard I. 2015. Identification and characterization of the adipokinetic hormone/corazonin-related peptide signaling system in *Rhodnius prolixus*. *Febs j* 282:3603-3617.

Zandawala M, Hamoudi Z, Lange AB, Orchard I. 2015. Adipokinetic hormone signalling system in the Chagas disease vector, *Rhodnius prolixus*. *Insect Mol Biol* 24:264-276.

Zhang G, Fang X, Guo X, Li L, Luo R, Xu F, Yang P, Zhang L, Wang X, Qi H, et al. 2012. The oyster genome reveals stress adaptation and complexity of shell formation. *Nature* 490:49-54.

```

1   aaaaactgatttgcttaagctggaagtaacaaaatattgatcgattgtcttgaaagatga
61  acctgtcccagttcattcttcggagacattactctgtattaagatcaatccacgtgtgat
121 gaaggttacggatacgcctgagacgtcaattgatgtcactggagtcgacaaatgctgtcac
181 gccgattagttgctagacttttttagccaatggcgcactggtgctcagctcacgtgataat
241 accgtcaactgtcccccttttactcatttcgggttccttgttttaaagcatcagacgtgac
301 ctcttgagattgatcaaaaagagctttatatgttcagtgtcaactcattatttcagcaga
361 taaagaccgtcagagtgattttttcacacagtatttacgtttatagtcacgttaatagtt
421 cacgtcacgaccactgggctacattaacacccatctatagatccgcgtaaacactcccaag
481 cccagctatctgtttataccggtaaccattaggtggagattgcctgccatacatttatgctg
541 cacgcgacacagcgtgcaagtctcagttcgttctcagtttagcaaccaagaaatagtgtaa
601 gcgcttcataaggaaaactgtaagagaagaacacaggagagtcactggagttaagaagcc
661 caagtcaccttataaggtaattttgtacagatggccgatatgaggatgttaacactcact
      M A D M R M L T L T 10
721 agcgtattagtcctctctactcttcatggcagaaaattcaaagatgccaagggcagatacat
      S V L V S L L F M A E I Q R C Q G Q I H 30
781 tacaagaatcctggatggggacctgggtgtaaaaggagttcacacatgactggtagcaat
      Y K N P G W G P G G K R S S H M T G S N 50
841 gtattaaggaaaacggcattggcgcgtggaatctgatcagatgggtacagacagcatgcag
      V L R K R H W R V E S D Q M G T D S M Q 70
901 aaagaacgaaacttgatcatgcttcaagaaattgcaaaatctttggcaaagcaactggta
      K E R N L I M L Q E I A K S L A K Q L V 90
961 gtaccaacgagtgaggacgacacagtcctggaccaattaacggtcgaccaatggcggcag
      V P T S E D D T V L D Q L T V D Q W R Q 110
1021 gaagcagacgagataaatgacaacggttggaaattaagcgggaaaagctctgaaatttgac
      E A D E I N D N G W N * 121
1081 aacaattatttagaatcaggaagaactgaacaacttgatacagggttcataatgtgtttgta
1141 ttgctttctttttt

```

**Supplementary Figure S4. *Asterias rubens* GnRH-type precursor (ArGnRHP).** The transcript cDNA sequence (lowercase; numbering on the left) and the deduced amino acid sequence (uppercase; numbering on the right) are shown. Within the amino acid sequence, the predicted signal peptide is highlighted in blue, the mature peptide sequence is highlighted in red, a putative dibasic cleavage site (KR) is highlighted in green and a GnRH-associated peptide is highlighted in grey. The asterisk denotes the stop codon. The transcript sequence encoding ArGnRHP (contig 1100532) was first identified by BLAST analysis of *A. rubens* radial nerve transcriptome sequence data (see ArGnRH1P in Semmens et al., 2016). A cDNA was amplified by PCR from *A. rubens* radial nerve cord cDNA using primers corresponding to the sequences highlighted in yellow. The cDNA was cloned in the vector pBluescript and T3 and T7 primers were used for sequencing. The cDNA sequence was found to be identical to the corresponding region of contig 1100532. This sequence has been deposited in GenBank database under accession number KT601712.

```

1      gactccggacatcatctgtagttgatctatcaatcgcggttcgaagacgatggggagttacg
2      gactccggacatcatctgtagttgatctatcaatcgcggttcgaagacgatggggagttac
62     tcggttacggccaccatatacctagccctagtttttaggttcttttagtatgtagcgccac
122    aatacgttcaccatgggtggacagaacaggtggaaagcaggggaaagagatcggctccc
182    gcagggcgccctcaacaaactttcttgaccatcaagcttcagtgaagatcagcaagga
242    gaaacgacaattacgctacgggagatgctggtcgacatgagagactactgcagtttcctc
302    ttgaagctacttgacaacggttcgctgcctcaaaccgaaagaaaatgacacttctaagat
362    gaaatcagacgccagactactataaccagctctatctttgtctatcttgcgaaatggagga
422    ggctgtgccagacatgaattgcaggaccttattaccagggagaccgtgatgggcagttc
482    cgattctctacttttagagtagtgacgtcattccgcaggataaaaaatgatggatgaaaat
542    cgactgagagggaccacccttgctgcttggggggtttactctccctcaacacagcgactat
602    gaaattaaacgagacaactgaaaagtgaaaacgacaaacttgatattttcagaatagta
662    catcagcccccttttcgattgtgtttgggggtgtgtacgcgggcgctttattctccaacg
722    tataaaaacctcctttgaccacacagctactaacaattgacattgctatcattcaattat
782    tcccgccgatattttcgacggtcctttttctttcttcaaaacaccgcgaattttttttt
842    gaacacgtggggattgaagcgtttttgagaaaacagttttctaaaaataaaccgatacga
902    ttaatttcccagccatttgacgttttaaaaacaagaagccctaccatactgcgtacattt
962    ttgatgttcctcgttcagttcatccttttaaaattttacaaattactctatgaaaaccta
1022   caaaccactagtttagattctaaaagcttattgctttttggaattctagtcccataagaaga
1082   caaataattcgtgtaagcatacaaatgtgcttaggcgtaagcgtatttttacaggttaa
1142   caagacaattgagcggccagctattgcagccaaggtttaccatcaataagcaccggaag
1202   ttagcatgctttaagagatgaaattcccccttaataataataataattattacgagtccea
1262   tataaggtgtaaacacggttcagcaagggtcaatgt

```

**Supplementary Figure S5. *Asterias rubens* corazonin-type precursor (ArCRZP).** The transcript cDNA sequence (lowercase; numbering on the left) and the deduced amino acid sequence (uppercase; numbering on the right) are shown. Within the amino acid sequence, the predicted signal peptide is highlighted in blue, the mature peptide sequence is highlighted in red, a putative dibasic cleavage site (KR) is highlighted in green and a corazonin-associated peptide (CAP) is highlighted in grey. The asterisk denotes the stop codon. The transcript sequence encoding ArCRZP (contig 1104992) was first identified by BLAST analysis of *A. rubens* radial nerve transcriptome sequence data (see ArGnRH2P in Semmens et al., 2016). A cDNA was amplified by PCR from *A. rubens* radial nerve cord cDNA using primers corresponding to the sequences highlighted in yellow. The cDNA was cloned in the vector pBluescript and T3 and T7 primers were used for sequencing. The cDNA sequence was found to be identical to the corresponding region of contig 1104992. This sequence has been deposited in GenBank under accession number KT601713.



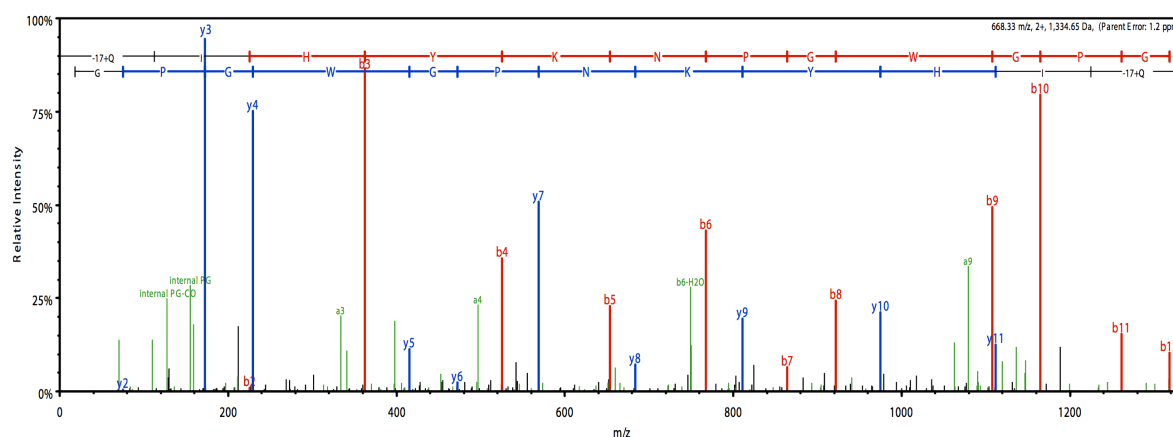

**Supplementary Figure S6. Mass spectrometric identification of the neuropeptide ArGnRH (pQIHYKNPGWGPG-NH<sub>2</sub>) in an acetic acid extract of radial nerve cords from *Asterias rubens*.** The experimentally determined monoisotopic mass of this peptide was 1334.65 Da, consistent with calculated monoisotopic mass (1334.652 Da). The deconvoluted, monoisotopic, singly charged spectrum derived from MS/MS data is shown, with the b series of fragment ions shown in red and fragment ions from the y series shown in blue. Additional identified peptide fragment ions are shown in green, including neutral loss of water.

### Mass spectrometry materials and methods, in detail

Frozen radial nerve cords extracts were thawed and an aliquot diluted 10-fold with 0.1% aqueous formic acid, then filtered through a 0.22  $\mu\text{m}$  Costar Spin-X centrifuge tube filter to remove particulates. The extract was analysed by means of nanoflow liquid chromatography with electrospray ionisation quadrupole time-of-flight tandem mass spectrometry (nanoLC-ESI-MS/MS) using a nanoAcquity UPLC system coupled to a Synapt G2 HDMS mass spectrometer (Waters Corporation, Milford, MA, USA) and MassLynx v4.1 SCN 908 software (Waters Corporation, Milford, MA, USA).

The mobile phases used for the chromatographic separation were: 0.1% aqueous formic acid (mobile phase A) and 0.1% formic acid in acetonitrile (mobile phase B). An aliquot containing 15  $\mu\text{L}$  of the extract was applied to a trapping column (Symmetry C18 180  $\mu\text{m} \times 20 \text{ mm}$ , 5  $\mu\text{m}$  particle size, 100  $\text{\AA}$  pore size, Waters Corporation) using 99.9% mobile phase A at a flow rate of 10  $\mu\text{L min}^{-1}$  for 3 min, after which the fluidic flow path included the analytical capillary column (HSS T3 75  $\mu\text{m} \times 150 \text{ mm}$ , 1.8  $\mu\text{m}$  particle size, 100  $\text{\AA}$  pore size, Waters Corporation). A linear gradient of 5–40% mobile phase B over 105 min was utilized with a total run time of 120 min.

The nanoflow ESI source conditions were as follows: capillary voltage 3.5 kV, sample cone voltage 25 V with a source temperature of 80°C. The instrument was operated in resolution mode ( $\sim 20,000$  measured at full width half height). A data-dependent acquisition was performed that would trigger an MS/MS scan on any multiply charged peptide of intensity  $\geq 450$  counts/sec within the survey scan  $m/z$  range 300–1950. A maximum of 5 precursor peptides were selected for MS/MS from each survey scan and MS/MS data collected for 6 scans then combined. Each peptide precursor was then excluded from selection for MS/MS for a period of 20 sec. MS/MS data was collected over  $m/z$  range 50–1950 using  $m/z$  and charge state dependent collision energy applied to the trap region.

Tandem mass spectra were extracted by ProteinLynx Global Server version 2.5.1 (Waters Corporation, Milford, MA, USA) with charge state deconvolution and deisotoping performed prior to creation of a peak list file for each sample. All MS/MS samples were

analyzed using Mascot (Matrix Science, London, UK; version 2.5.0). Mascot was set up to search an *Asterias rubens* neuropeptide precursor database containing 168 entries (including ArGnRHP and ArCRZP) assuming non-specific cleavage sites. Mascot was searched with a fragment ion mass tolerance of 0.100 Da and a parent ion tolerance of 25 ppm. Gly-loss+Amide of the C-terminus, gln->pyro-Glu of the N-terminus, amidation of the C-terminus and oxidation of methionine were specified in Mascot as variable modifications.

Scaffold (version Scaffold\_4.2.1, Proteome Software Inc., Portland, OR) was used to validate MS/MS based peptide and protein identifications. Peptide Probabilities from Mascot were assigned by the Scaffold Local FDR algorithm. Protein identifications were accepted if they could be established at greater than 99.0% probability and contained at least 1 identified peptide. Protein probabilities were assigned by the Protein Prophet algorithm (Nesvizhskii, Al et al *Anal. Chem.* 2003;75(17):4646-58).

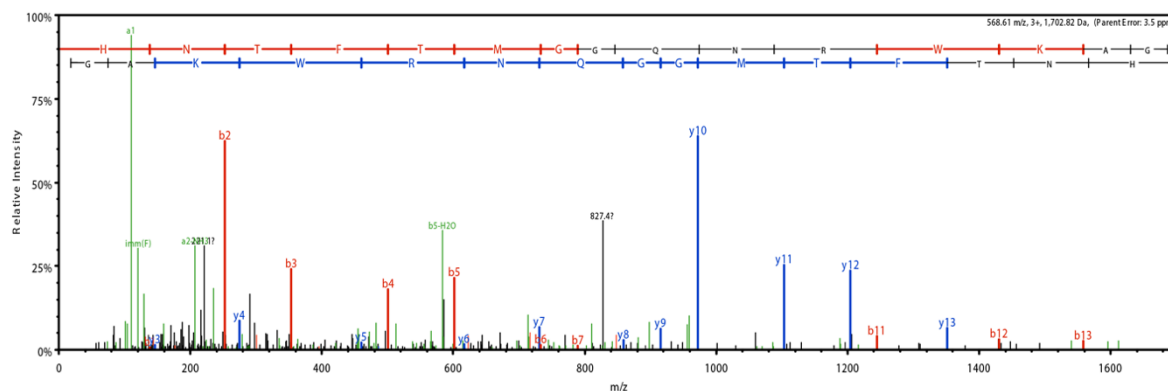

**Supplementary Figure S7. Mass spectrometric identification of the neuropeptide ArCRZ (HNTFTMGGQNRWKAG-NH<sub>2</sub>) in a methanol - acetic acid extract of radial nerve cords from *Asterias rubens*.** The experimentally determined monoisotopic mass of this peptide was 1702.82 Da, consistent with calculated monoisotopic mass (1702.811 Da). The deconvoluted, monoisotopic, singly charged spectrum derived from MS/MS data is shown, with the b series of fragment ions shown in red and fragment ions from the y series shown in blue. Additional identified peptide fragment ions are shown in green, including neutral loss of water and immonium ions.

**For mass spectrometry materials and methods in detail, see Fig. S6.**

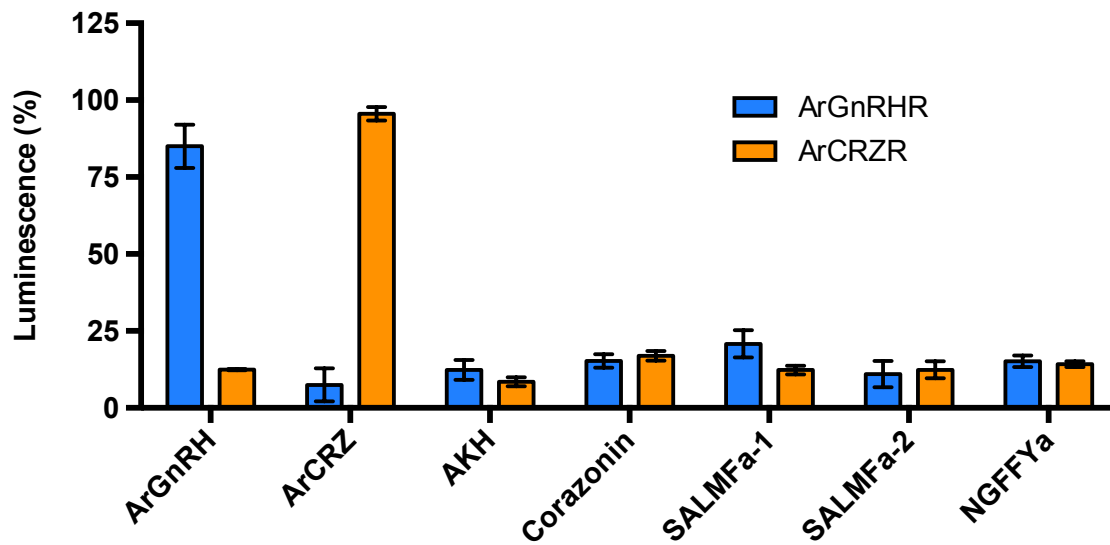

**Supplementary Figure S8. ArGnRHR and ArCRZR are specifically activated by ArGnRH and ArCRZ, respectively.** Neither ArGnRHR nor ArCRZR are activated by other GnRH/CRZ-type neuropeptides (*Drosophila* AKH; *Drosophila* Corazonin) or by other starfish neuropeptides (SALMFamide-1, SALMFamide-2, and NGFFYamide). All peptides were tested at the concentration of  $10^{-5}$  M and the luminescence responses were normalised to the maximum receptor activation.

**a**

```

A. rub GnRH  -----MADMR---MLTSLVSVLSLFLMAE-IQRCCQGIHYKNPGWGPCKR---SS-----HMTGSNVLRKRHWVRE 60
S. pur GnRH1 -----MKQIITSLVVISIAALLFLVLISEYTPRCNGOVHHRFSGWRPCKR---SS-----DAAEVNSNKITIERPQLPICQTTTEERQLTEG 78
H. sap GnRH  -----MCLR---MKPIQKLLAGLILLTWCVEGCSSQ-HW-SYGLRPGGKRDA-----ENLDSFQELVKE 55
A. gam ACP   MNSISSRHLAAKFLLLVALCAVLLPVP-----SAGQVTF-SRDWN-AGKRAM-----PDSEVSGAECSAVWRS 63
S. mar ACP   -----MK-----WIAVYLLLTIIIVLTIVAP-VEGOVTF-SRDWTPAGKRGM-----DCGFVKTKLPRDI 52
A. gam AKH   -----MDTVK-LFTVLLICASLMLI-----TEAQVTF-TPAW---GKRS-----QGAMG 39
D. pul AKH   -----MANHR-ILILFLMIGL-----ASAQVNF-STSW---GKRSPSTSTKAAEPPSAPSYRONFHSKKVEPGTLET-PNNQHVPES 73
S. mar AKH   -----MTKFT-WLSMTLLVLMVFITVD-----VNGQINF-SPGWG-QGKRSL-----PQVTP 39
C. ele AKH   -----MQ-----LYVVLCLFVLLGL-----SAGQMTF-TDQWT---KKRAT-----HKQLPVTP 42
L. gig AKH   -----MSLSR-NLSVLVCLCCLLSM-----CLAQTHF-SPTWG-SGKRSA-----PQTY 42

A. rub GnRH  SIQVGTDSMQKE-----RNLMTQEAQKSLAKQIVVPTSDDTVLDQLTVDQWRQEADEINDNGWN 121
S. pur GnRH1 DSDLGDLRRAA-----NRMRLQVFNKSTRLNLDNATSNEVDERPVYGDYLGTL-----131
H. sap GnRH  VGQVLAETQRFEC-----TTHQPRSPTRDLKGALESLEIEEETGQKKI-----96
A. gam ACP   VNNLCAAVTKNI-----OHLTTCETRSKSLQTDDESSMESNSGNNLPMFSNNHI-----113
S. mar ACP   AVLQVQYHFAE-----LCMTTFAWMLDGGQFTEILLWTS CDGAFP-----93
A. gam AKH   INPLGSTFFGQDA-----CKTPVDSLIVYRMOEAQKIVDCSQK-----79
D. pul AKH   FDTVSSTIYDDAEQORISISLSPCLSIKSLILVNQIVVEFKNSPIIDGRMHRFKIENLFPNRTCRLYIRR-----145
S. mar AKH   SDKPVNGYSDC-----SETMIEVYRLK-----63
C. ele AKH   EPIPCSDRVQA-----VFEQDDQIQKAQORLTEYFASCAYPVEVPQKAEM-----89
L. gig AKH   PDSSTNCTCYDKL-----NTKILVQLVKIKKESEELTACLLQDDDFLRR-----86

```

**b**

```

A. rub CRZ  -----MGYSVVTATYIALVLSLVCSS--AHNTFTMGGQNRWKAGGKRSSAPA-----45
S. pur CRZ  -----MDSNMTVRSVLVLSVLLAVVSCH--AHNTFSFKGRSRYFPCKRAITD-----46
S. kow CRZ  -----MNRSTAKTTCILALFVLLQLLSHGQAQPHFSLKDRYRWKPKKRANAGL-----49
B. flo CRZ  -----MAARLPALLAVLLLAQILCA---RAFTYT--HTW--GRKRADSS-----37
A. gam CRZ  -----MLHTRTIALLLVGLVVLVNA---OTFQYS--RGWTNGKRSPSSSSSSPSSSAAMEPLTANQLLASALSPGGNLSLKPSEKALL 79
D. pul CRZ  MFINQVRYRYSISIAMAVRLYFVLLLVVSSA--MAQTFQYS--RGWTNGKRSDPS-----51
S. mar CRZ  -----MGFQKTKLLIVASILVFIICT--SGOTFQYS--RGWEPGRKRAV-----41
L. gig CRZ  -----MMPVPLKYFGLALTLALVTELAVGQHYHFS--NGWKSGRKRSGGV-----43

A. rub CRZ  -----GRPQOTF-----LDPSSFSDDQGETT-----HTLEEMVDMRQYCSFKKLLDNVRLPQTERK-----99
S. pur CRZ  -----GSAVDTASQR-----FESINIDDFKPEQ-----HTLEEMTELRGYCDFKLLDGVRLPDLQQRK-----104
S. kow CRZ  RLPATLS-----LLLQVNSDYRTMA-----INDIDNFNSAEDDAVKEY-----91
B. flo CRZ  -----ELLTPHAAA-----DSVSAAEVYDASEGS-----EVTLEDFFKMAVRTLFRILCDYLQKRTNQ-----90
A. gam CRZ  RRFLRNPCDLRVASLLAAAHPTKELFPLAGNSFD SAESAGAA---FVLPPFMVPE SNGGIGCSNLANGRSMEDELRFKRGATGFSDRHOKIA 171
D. pul CRZ  -----FVQQQQWIQRNGHPVIVPAEFRSNSFEDW SRYRINSEKVELVLCSCVTF SKRDFMLISVGCCHDDNF-----117
S. mar CRZ  -----DRSYQVRDWDAGR-----KRENTRGLDSS TAWILCL---KRAAFN-----78
L. gig CRZ  -----SNLCEMRPEL-----INYINTLISEELNRIK-----NTCNLNTETKDSVDVDES EGAFSRLQNGLKLAAADRKWK-----107

```

### Supplementary Figure S9. Alignments of GnRH/AKH/ACP/CRZ-type neuropeptide precursors.

(a) Alignment of ArGnRH precursor sequence with GnRH-, AKH- and ACP-type precursors from other species. The predicted or known neuropeptide sequences (without post-translational modifications) are highlighted in red. (b) Alignment of ArCRZ precursor sequence with CRZ-type precursors from other species. The predicted or known neuropeptide sequences (without post-translational modifications) are highlighted in purple. For both the alignments, the signal peptides are highlighted in blue, N-terminal glutamine residues that are predicted or known to be converted to a pyroglutamate are highlighted in pink, C-terminal glycine residues that are predicted or known to be substrates for C-terminal amidation are highlighted in olive and di-/tri-basic cleavage sites are highlighted in light blue in the *B. floridae* CRZ-type precursor are predicted to be a part of the signal peptide but were proposed previously to form the N-terminal region of the neuropeptide derived from this precursor (Roch, et al. 2014). The positions of introns in genes encoding these proteins are shown by highlighting in light green the amino acid(s) that are interrupted by introns in the corresponding genomic sequence, if this information is available. Note that the deuterostomian GnRH-type precursors (S.pur and H.sap) have two introns, which distinguishes them from deuterostomian CRZ-type precursors (S.pur, S. kow, B.flo) that have only one intron.

Species names are as follows: A.rub, *Asterias rubens*; S.pur, *Strongylocentrotus purpuratus*; H.sap, *Homo sapiens*; A.gam, *Anopheles gambiae*; S.mar, *Strigamia maritima*; D.pul, *Daphnia pulex*; C.ele, *Caenorhabditis elegans*; L.gig, *Lottia gigantea*; B.flo, *Branchiostoma floridae*.

Accession numbers and citations for sequences included in the alignments

a. *A. rub* GnRH, KT601712, (Semmens, et al. 2016) ; *S. pur* GnRH1, NW\_011972626.1, (Sodergren, et al. 2006); *H. sap* GnRH, BC126437, (Strausberg, et al. 2002) ; *A. gam* ACP, XP\_563757, (Holt, et al. 2002); *S. mar* ACP, AFFK01019675, (Chipman, et al. 2014) ; *A. gam* AKH, XM\_001689138, (Holt, et al. 2002) ; *D. pul* AKH, EFX68649, (Colbourne, et al. 2011); *S. mar* AKH, AFFK01019834, (Chipman, et al. 2014); *C. ele* AKH, NM\_068369, (Sulson 1998) ; *L. gig* AKH, FC743844.1, (Simakov, et al. 2013).

b. *A. rub* CRZ, KT601713, (Semmens, et al. 2016); *S. pur* CRZ, XR\_971124, (Sodergren, et al. 2006) ; *S. kow* CRZ, XR\_438542, (Simakov, et al. 2015); *B. flo* CRZ, KF601546.1, (Roch, et al. 2014) ; *A. gam* CRZ, XM\_001237037.1, (Holt, et al. 2002) ; *D. plu* CRZ, EU817501, (Colbourne, et al. 2011) ; *S. mar* CRZ, AFFK01019339.1, (Chipman, et al. 2014) ; *L. gig* CRZ, FC805607.1, (Simakov, et al. 2013).

## References

- Chipman AD, Ferrier DE, Brena C, Qu J, Hughes DS, Schroder R, Torres-Oliva M, Znassi N, Jiang H, Almeida FC, et al. 2014. The first myriapod genome sequence reveals conservative arthropod gene content and genome organisation in the centipede *Strigamia maritima*. *PLoS Biol* 12:e1002005.
- Colbourne JK, Pfrender ME, Gilbert D, Thomas WK, Tucker A, Oakley TH, Tokishita S, Aerts A, Arnold GJ, Basu MK, et al. 2011. The ecoresponsive genome of *Daphnia pulex*. *Science* 331:555-561.
- Holt RA, Subramanian GM, Halpern A, Sutton GG, Charlab R, Nusskern DR, Wincker P, Clark AG, Ribeiro JM, Wides R, et al. 2002. The genome sequence of the malaria mosquito *Anopheles gambiae*. *Science* 298:129-149.
- Roch GJ, Tello JA, Sherwood NM. 2014. At the transition from invertebrates to vertebrates, a novel GnRH-like peptide emerges in amphioxus. *Mol Biol Evol* 31:765-778.
- Semmens DC, Mirabeau O, Moghul I, Pancholi MR, Wurm Y, Elphick MR. 2016. Transcriptomic identification of starfish neuropeptide precursors yields new insights into neuropeptide evolution. *Open Biol* 6.
- Simakov O, Kawashima T, Marletaz F, Jenkins J, Koyanagi R, Mitros T, Hisata K, Bredeson J, Shoguchi E, Gyoja F, et al. 2015. Hemichordate genomes and deuterostome origins. *Nature* 527:459-465.
- Simakov O, Marletaz F, Cho SJ, Edsinger-Gonzales E, Havlak P, Hellsten U, Kuo DH, Larsson T, Lv J, Arendt D, et al. 2013. Insights into bilaterian evolution from three spiralian genomes. *Nature* 493:526-531.
- Sodergren E, Weinstock GM, Davidson EH, Cameron RA, Gibbs RA, Angerer RC, Angerer LM, Arnone MI, Burgess DR, Burke RD, et al. 2006. The genome of the sea urchin *Strongylocentrotus purpuratus*. *Science* 314:941-952.
- Strausberg RL, Feingold EA, Grouse LH, Derge JG, Klausner RD, Collins FS, Wagner L, Shenmen CM, Schuler GD, Altschul SF, et al. 2002. Generation and initial analysis of more than 15,000 full-length human and mouse cDNA sequences. *Proc Natl Acad Sci U S A* 99:16899-16903.
- Sulson JEaW, R. 1998. Genome sequence of the nematode *C. elegans*: a platform for investigating biology. *Science* 282:2012-2018.

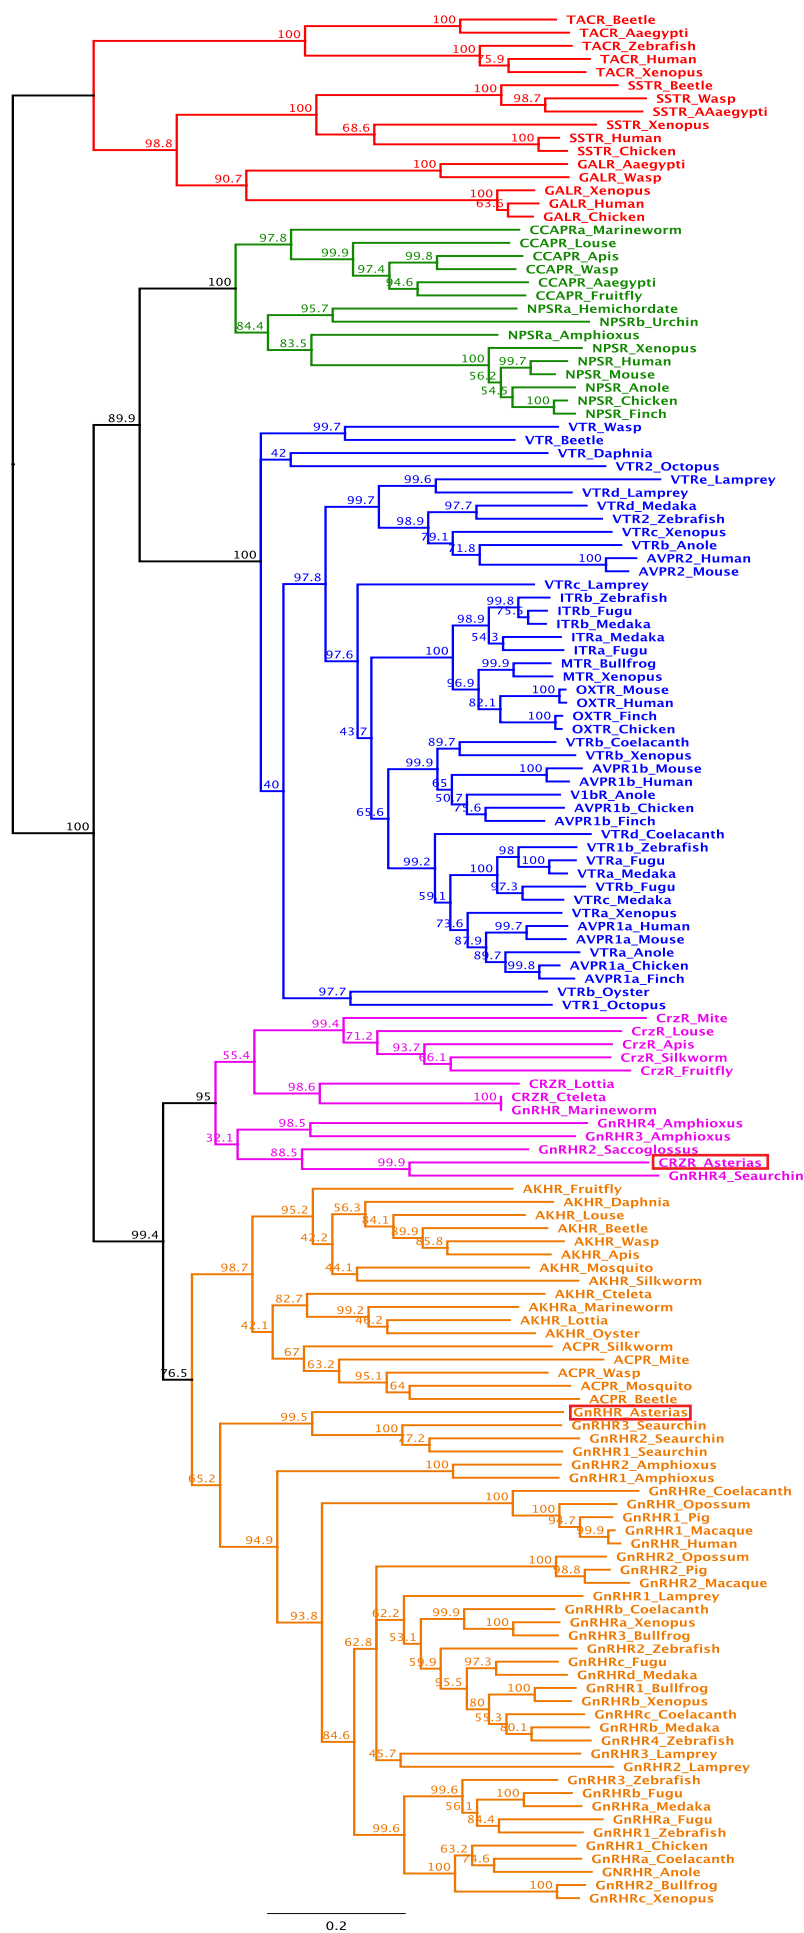

**Supplementary Figure S10. Phylogenetic analysis of GnRH/AKH/ACP-type, corazonin-type, vasopressin/oxytocin-type and NPS/CCAP-type receptors using a neighbor-joining method reveals distinct clades for each superfamily.** GnRH/AKH/ACP-type receptors are shown in orange, corazonin (CRZ)-type receptors are shown in pink, vasopressin/oxytocin-type receptors are shown in blue and NPS/CCAP-type receptors are shown in green. The outgroup (shown in red) includes tachykinin-type (TACR), somatostatin-type (SSTR), and galanin-type (GALR) receptors. All of the receptor sequences were obtained from Roch et al., 2014, with the exception of the *Asterias rubens* GnRH-type and CRZ-type receptors reported in this paper, which are highlighted (red boxes). The scale bar indicates amino acid substitutions per site. Receptor sequences were aligned and de-gapped as described in Materials and Methods. Geneious 8.0.5 was used to obtain a neighbor-joining tree with 1000 bootstrap replicates.

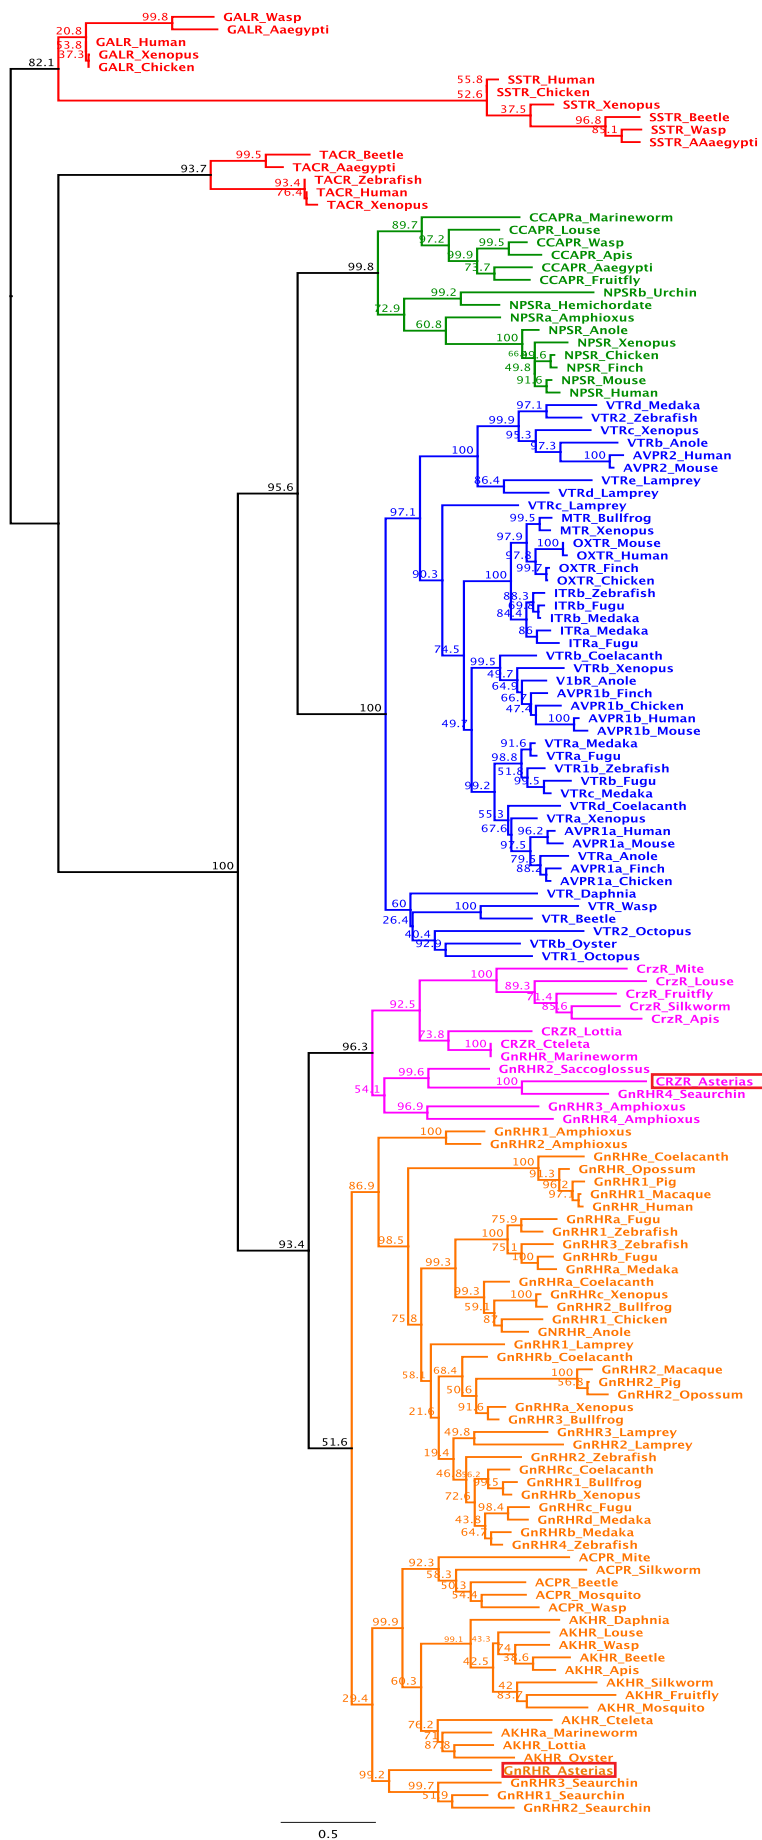

**Supplementary Figure S11. Phylogenetic analysis of GnRH/AKH/ACP-type, corazonin-type, vasopressin/oxytocin-type and NPS/CCAP-type receptors using a maximum-likelihood method reveals distinct clades for each superfamily.**

GnRH/AKH/ACP-type receptors are shown in orange, Corazonin (CRZ)-type receptors are shown in pink, Vasopressin/Oxytocin-type receptors are shown in blue and NPS/CCAP-type receptors are shown in green. The outgroup (shown in red) includes tachykinin-type (TACR), somatostatin-type (SSTR), and galanin-type (GALR) receptors. All of the receptor sequences were obtained from Roch et al., 2014, with the exception of the *Asterias rubens* GnRH-type and CRZ-type receptors reported in this paper, which are highlighted (red boxes). The scale bar indicates amino acid substitutions per site. The analysis was conducted as described in Materials and Methods.
